# Supplementary material for: High performance transient organic solar cells on biodegradable polyvinyl alcohol composite substrates
Source: Royal Society of Chemistry journal article supplement (doi:10.1039/c7ra11191f), 2017-01-01
Supplement: c7ra11191f1.pdf [file c7ra11191f1.pdf]

**Supporting Information:**

# **High Performance Transient Organic Solar Cells on Biodegradable Polyvinyl Alcohol Composite Substrates**

He Xi,<sup>†\*a</sup> Dazheng Chen,<sup>†b</sup> Ling Lv,<sup>a</sup> Peng Zhong,<sup>a</sup> Zhenhua Lin,<sup>b</sup> Jingjing Chang,<sup>b</sup> Hong Wang,<sup>a</sup> Bin Wang,<sup>a,c</sup> Xiaohua Ma<sup>\*a</sup> and Chunfu Zhang<sup>\*b</sup>

<sup>a</sup>School of Advanced Materials and Nanotechnology, State Key Laboratory of Wide Band Gap Semiconductor Technology, Xidian University, 266 Xinglong Section of Xifeng Road, Xi'an, 710126, China. Email: [hxi@xidian.edu.cn](mailto:hxi@xidian.edu.cn), [xhma@xidian.edu.cn](mailto:xhma@xidian.edu.cn)

<sup>b</sup>State Key Laboratory of Wide Band Gap Semiconductor Technology, School of Microelectronics, Xidian University, 2 South Taibai Road, Xi'an, 710071, China. Email: [cfzhang@xidian.edu.cn](mailto:cfzhang@xidian.edu.cn)

<sup>c</sup>Key Laboratory of Microelectronic Devices & Integrated Technology, Institute of Microelectronics, Chinese Academy of Sciences, Beijing, 100029, China

## **Table of Contents**

|                                                                                   |    |
|-----------------------------------------------------------------------------------|----|
| Denotations for each sample with varying chemical compositions                    | S2 |
| Optical images of PVA/sucrose and PVA/gelatin films to exhibit their transparency | S2 |
| AFM images of PVA/sucrose and PVA/gelatin composites thin films                   | S3 |
| Schematic diagram of fabrication process for PVA substrates and transient OSCs    | S3 |
| IPCE spectra of transient OSCs on PVA/sucrose and PVA/gelatin substrates          | S4 |



**Table S1.** Denotations for each polymer with varying chemical compositions.

| Polymer composite | PVA / g | Sucrose / g | Gelatin / g | PVA-to-filler ratios |
|-------------------|---------|-------------|-------------|----------------------|
| PVA               | 1       | 0           | 0           | 1:0                  |
| PS10              | 1       | 0.1         | 0           | 10:1                 |
| PS2               | 1       | 0.5         | 0           | 2:1                  |
| PS1               | 1       | 1           | 0           | 1:1                  |
| PS0.5             | 1       | 2           | 0           | 1:2                  |
| PG10              | 1       | 0           | 0.1         | 10:1                 |
| PG2               | 1       | 0           | 0.5         | 2:1                  |
| PG1               | 1       | 0           | 1           | 1:1                  |
| PG0.5             | 1       | 0           | 2           | 1:2                  |

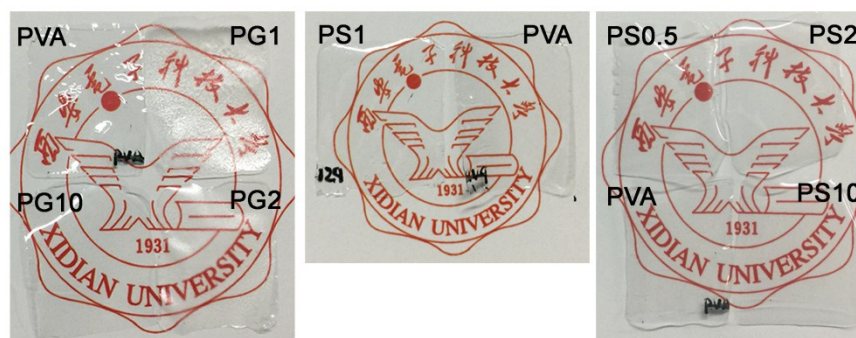

**Figure S1.** Optical images of the PVA/sucrose and PVA/gelatin films with close contact to the logo of Xidian University to exhibit their transparency.

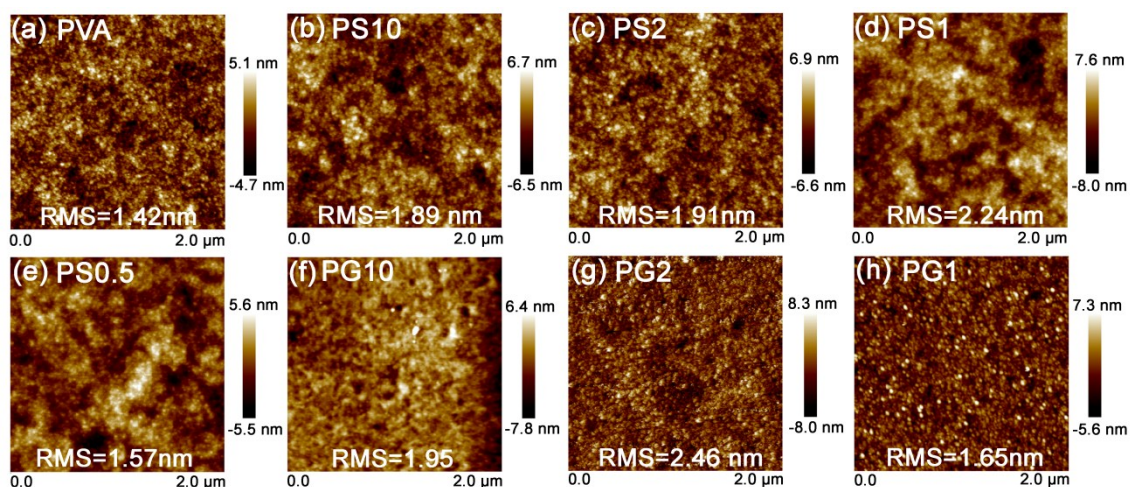

**Figure S2.** Surface AFM images ( $2 \times 2 \mu\text{m}$ ) of the PVA thin films without (a), and with sucrose (b-e) or gelatin (f-h) doping in different concentrations on glass substrates. It is notable that for all polymer samples, the surface close to the glass substrate was used for AFM measurement.

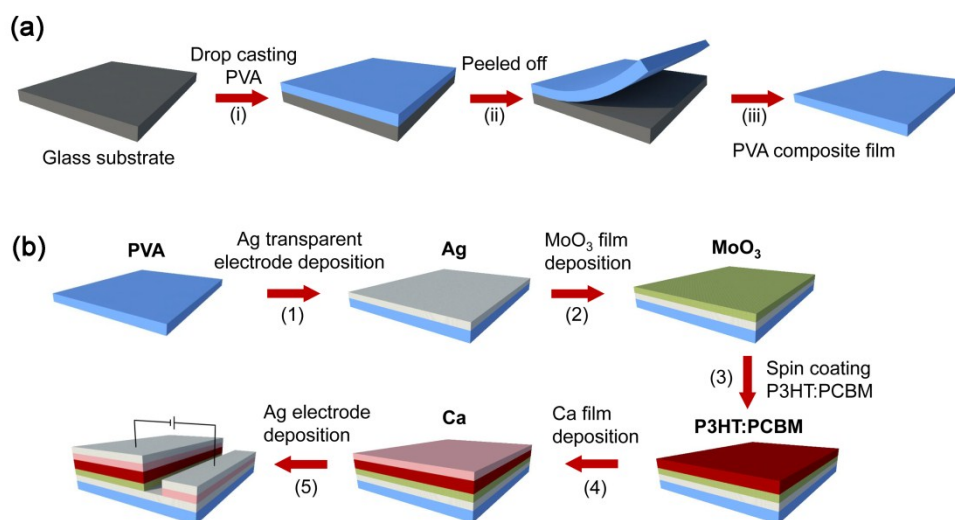

**Figure S3.** Schematic diagram of fabrication process for (a) PVA-based substrates and (b) the transient OSCs.

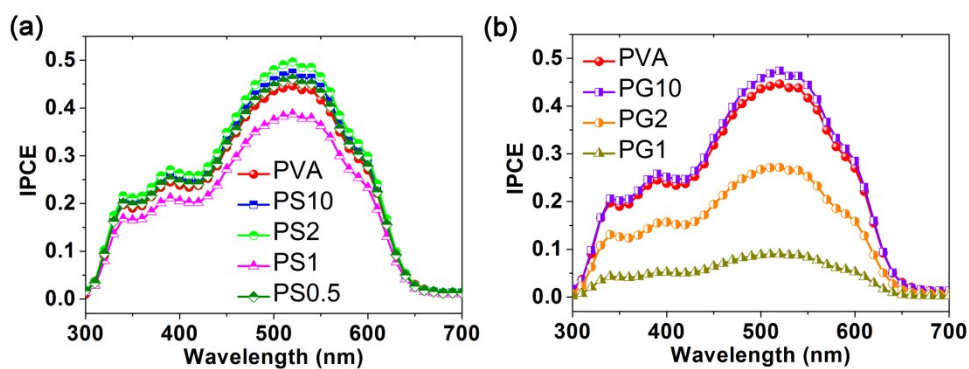

**Figure S4.** IPCE spectra of the transient OSCs fabricated on (a) PVA/sucrose and (b) PVA/gelatin substrates.

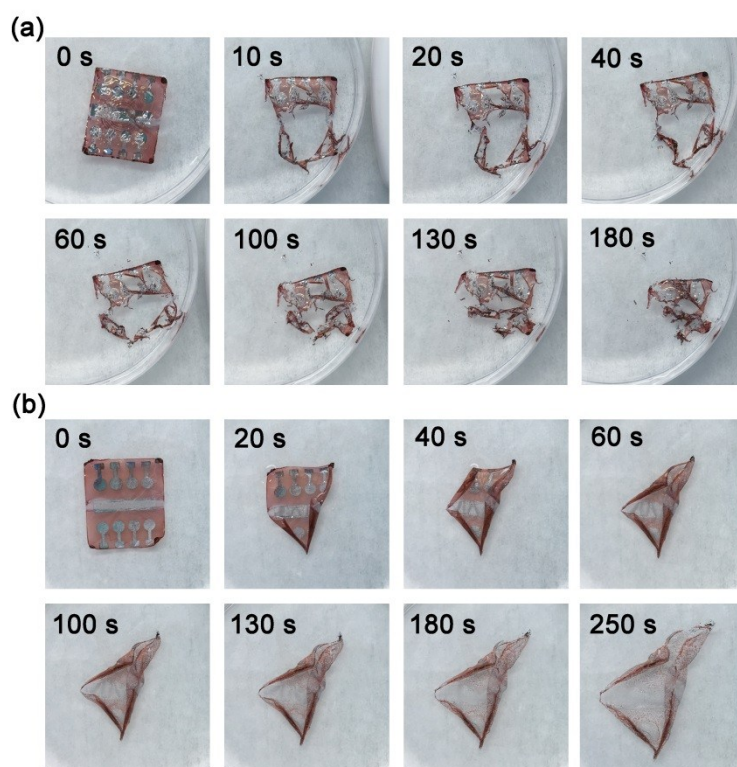

**Figure S5.** Optical pictures illustrating time sequence of the dissolution of transient OSCs on PS2 substrate (a) and PG2 substrate (b) in DI water at room temperature.
